# Supplementary material for: A Smartphone App to Support Adherence to Inhaled Corticosteroids in Young Adults With Asthma: Multi-Methods Feasibility Study
Source: PubMed Central journal article supplement (PMC8444040; doi:10.2196/28784), 2021-09-01
Supplement: formative_v5i9e28784_app3.pdf [file formative_v5i9e28784_app3.pdf]

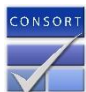

## Appendix C

### CONSORT 2010 checklist of information to include when reporting a pilot or feasibility trial\*

| Section/Topic             | Item No | Checklist item                                                                                                                                               | Reported on page No |
|---------------------------|---------|--------------------------------------------------------------------------------------------------------------------------------------------------------------|---------------------|
| <b>Title and abstract</b> |         |                                                                                                                                                              |                     |
|                           | 1a      | Identification as a pilot or feasibility randomised trial in the title                                                                                       | Title section       |
|                           | 1b      | Structured summary of pilot trial design, methods, results, and conclusions (for specific guidance see CONSORT abstract extension for pilot trials)          | Abstract section    |
| <b>Introduction</b>       |         |                                                                                                                                                              |                     |
| Background and objectives | 2a      | Scientific background and explanation of rationale for future definitive trial, and reasons for randomised pilot trial                                       | 1                   |
|                           | 2b      | Specific objectives or research questions for pilot trial                                                                                                    | 1-2                 |
| <b>Methods</b>            |         |                                                                                                                                                              |                     |
| Trial design              | 3a      | Description of pilot trial design (such as parallel, factorial) including allocation ratio                                                                   | 2                   |
|                           | 3b      | Important changes to methods after pilot trial commencement (such as eligibility criteria), with reasons                                                     | NA                  |
| Participants              | 4a      | Eligibility criteria for participants                                                                                                                        | 3                   |
|                           | 4b      | Settings and locations where the data were collected                                                                                                         | 2                   |
|                           | 4c      | How participants were identified and consented                                                                                                               | 2-4                 |
| Interventions             | 5       | The interventions for each group with sufficient details to allow replication, including how and when they were actually administered                        | 5-6                 |
| Outcomes                  | 6a      | Completely defined prespecified assessments or measurements to address each pilot trial objective specified in 2b, including how and when they were assessed | 4-5                 |
|                           | 6b      | Any changes to pilot trial assessments or measurements after the pilot trial commenced, with reasons                                                         | NA                  |
|                           | 6c      | If applicable, prespecified criteria used to judge whether, or how, to proceed with future definitive trial                                                  | Table 1, Appendix 8 |
| Sample size               | 7a      | Rationale for numbers in the pilot trial                                                                                                                     | 4                   |
|                           | 7b      | When applicable, explanation of any interim analyses and stopping guidelines                                                                                 | NA                  |
| Randomisation:            |         |                                                                                                                                                              |                     |
| Sequence                  | 8a      | Method used to generate the random allocation sequence                                                                                                       | NA                  |

|                                                      |     |                                                                                                                                                                                             |                  |
|------------------------------------------------------|-----|---------------------------------------------------------------------------------------------------------------------------------------------------------------------------------------------|------------------|
| generation                                           | 8b  | Type of randomisation(s); details of any restriction (such as blocking and block size)                                                                                                      | NA               |
| Allocation concealment mechanism                     | 9   | Mechanism used to implement the random allocation sequence (such as sequentially numbered containers), describing any steps taken to conceal the sequence until interventions were assigned | NA               |
| Implementation                                       | 10  | Who generated the random allocation sequence, who enrolled participants, and who assigned participants to interventions                                                                     | NA               |
| Blinding                                             | 11a | If done, who was blinded after assignment to interventions (for example, participants, care providers, those assessing outcomes) and how                                                    | NA               |
|                                                      | 11b | If relevant, description of the similarity of interventions                                                                                                                                 | NA               |
| Statistical methods                                  | 12  | Methods used to address each pilot trial objective whether qualitative or quantitative                                                                                                      | 4-5, 6           |
| <b>Results</b>                                       |     |                                                                                                                                                                                             |                  |
| Participant flow (a diagram is strongly recommended) | 13a | For each group, the numbers of participants who were approached and/or assessed for eligibility, randomly assigned, received intended treatment, and were assessed for each objective       | NA               |
|                                                      | 13b | For each group, losses and exclusions after randomisation, together with reasons                                                                                                            | NA               |
| Recruitment                                          | 14a | Dates defining the periods of recruitment and follow-up                                                                                                                                     | 2                |
|                                                      | 14b | Why the pilot trial ended or was stopped                                                                                                                                                    | NA               |
| Baseline data                                        | 15  | A table showing baseline demographic and clinical characteristics for each group                                                                                                            | Table 1, Pg. 7-8 |
| Numbers analysed                                     | 16  | For each objective, number of participants (denominator) included in each analysis. If relevant, these numbers should be by randomised group                                                | 8-9              |
| Outcomes and estimation                              | 17  | For each objective, results including expressions of uncertainty (such as 95% confidence interval) for any estimates. If relevant, these results should be by randomised group              | 8-11             |
| Ancillary analyses                                   | 18  | Results of any other analyses performed that could be used to inform the future definitive trial                                                                                            | NA               |
| Harms                                                | 19  | All important harms or unintended effects in each group (for specific guidance see CONSORT for harms)                                                                                       | NA               |
|                                                      | 19a | If relevant, other important unintended consequences                                                                                                                                        | NA               |
| <b>Discussion</b>                                    |     |                                                                                                                                                                                             |                  |
| Limitations                                          | 20  | Pilot trial limitations, addressing sources of potential bias and remaining uncertainty about feasibility                                                                                   | 12-16            |
| Generalisability                                     | 21  | Generalisability (applicability) of pilot trial methods and findings to future definitive trial and other studies                                                                           | 12-16            |
| Interpretation                                       | 22  | Interpretation consistent with pilot trial objectives and findings, balancing potential benefits and harms, and considering other relevant evidence                                         | 12-16            |

|                          |     |                                                                                                       |                                   |
|--------------------------|-----|-------------------------------------------------------------------------------------------------------|-----------------------------------|
|                          | 22a | Implications for progression from pilot to future definitive trial, including any proposed amendments | 12-16,<br>Table 4,<br>Appendix 13 |
| <b>Other information</b> |     |                                                                                                       |                                   |
| Registration             | 23  | Registration number for pilot trial and name of trial registry                                        | Trial<br>registration<br>section  |
| Protocol                 | 24  | Where the pilot trial protocol can be accessed, if available                                          | NA                                |
| Funding                  | 25  | Sources of funding and other support (such as supply of drugs), role of funders                       | 16                                |
|                          | 26  | Ethical approval or approval by research review committee, confirmed with reference number            | 2                                 |
