# Supplementary material for: A Smartphone App to Support Adherence to Inhaled Corticosteroids in Young Adults With Asthma: Multi-Methods Feasibility Study
Source: PubMed Central journal article supplement (PMC8444040; doi:10.2196/28784), 2021-09-01
Supplement: formative_v5i9e28784_app8.pdf [file formative_v5i9e28784_app8.pdf]

**Table S1.** Go- and No-Go progression criteria

|                                                                                | Go – Proceed with RCT                  | Amend – Proceed with changes           | Stop – Do not proceed unless changes are possible |
|--------------------------------------------------------------------------------|----------------------------------------|----------------------------------------|---------------------------------------------------|
| <b>1. Feasibility of participant recruitment</b>                               |                                        |                                        |                                                   |
| Can $\geq 74$ participants be recruited to take part in the study?             | $\geq 74$ participants                 | $\geq 65$ participants                 | $< 61$ participants                               |
| <b>2. Feasibility of participant retention</b>                                 |                                        |                                        |                                                   |
| Can $\geq 59$ participants be retained in the study until completion?          | $\geq 59$ retained                     | $\geq 50$ retained                     | $< 40$ retained                                   |
| <b>3. Usability of ‘AsthmaMD’</b>                                              |                                        |                                        |                                                   |
| Will the app receive a mean SUS score $> 68$ ?                                 | SUS $> 68$                             | SUS $\geq 63$                          | SUS $< 52$                                        |
| <i>and</i>                                                                     | <i>and</i>                             | <i>and</i>                             | <i>and</i>                                        |
| Interpretation of qualitative data relating to usability                       | App judged highly usable               | App judged usable                      | App judged possibly usable                        |
| <b>4. Acceptability of ‘AsthmaMD’</b>                                          |                                        |                                        |                                                   |
| Will the app receive a mean score $\geq 5$ for overall user satisfaction?      | $\geq 5$ overall satisfaction          | $\geq 4$ overall satisfaction          | $< 4$ overall satisfaction                        |
| <i>or</i>                                                                      | <i>or</i>                              | <i>or</i>                              | <i>or</i>                                         |
| Will $\geq 30\%$ of participants agree to 3/5 acceptability-related questions? | $\geq 30\%$ agree to 3/5 questions     | $\geq 30\%$ agree to 2/5 questions     | $< 30\%$ agree to $< 2/5$ questions               |
| <i>and</i>                                                                     | <i>and</i>                             | <i>and</i>                             | <i>and</i>                                        |
| Interpretation of qualitative data relating to acceptability                   | App judged highly acceptable           | App judged acceptable                  | App judged possibly acceptable                    |
| <b>5. Feasibility of ‘AsthmaMD’</b>                                            |                                        |                                        |                                                   |
| Did $\geq 30\%$ of participants use the app $\geq 1$ day per week?             | $\geq 30\%$ used app $\geq 1$ day/week | $\geq 25\%$ used app $\geq 1$ day/week | $< 20\%$ used app $< 1$ day/week                  |
| <i>or</i>                                                                      | <i>or</i>                              | <i>or</i>                              | <i>or</i>                                         |
| Would $\geq 30\%$ of participants continue to use the app after the study?     | $\geq 30\%$ continue to use app        | $\geq 25\%$ continue to use app        | $< 20\%$ continue to use app                      |
| <i>And</i>                                                                     | <i>And</i>                             | <i>and</i>                             | <i>and</i>                                        |
| Interpretation of qualitative data relating to feasibility                     | App judged highly feasible             | App judged feasible                    | App judged possibly feasible                      |
