# Supplementary material for: A Smartphone App to Support Adherence to Inhaled Corticosteroids in Young Adults With Asthma: Multi-Methods Feasibility Study
Source: PubMed Central journal article supplement (PMC8444040; doi:10.2196/28784), 2021-09-01
Supplement: formative_v5i9e28784_app13.pdf [file formative_v5i9e28784_app13.pdf]

**Table S2.** Outcomes of Go- and No-Go progression criteria

|                                                                                      | Go – Proceed with RCT                                                                       | Amend – Proceed with changes                                         | Stop – Do not proceed unless changes are possible |
|--------------------------------------------------------------------------------------|---------------------------------------------------------------------------------------------|----------------------------------------------------------------------|---------------------------------------------------|
| <b>1. Feasibility of participant recruitment</b>                                     |                                                                                             |                                                                      |                                                   |
| Can $\geq 74$ participants be recruited to take part in the study?                   | $\geq 74$ participants: 122 participants were recruited to take part in the study           | N/A <sup>a</sup>                                                     | N/A                                               |
| <b>2. Feasibility of participant retention</b>                                       |                                                                                             |                                                                      |                                                   |
| Can $\geq 59$ participants be retained in the study until completion?                | $\geq 59$ retained: 59/122 (48.4%) participants were retained in the study until completion | N/A                                                                  | N/A                                               |
| <b>3. Usability of ‘AsthmaMD’</b>                                                    |                                                                                             |                                                                      |                                                   |
| Will the app receive a mean SUS score $>68$ ?                                        | N/A                                                                                         | SUS $\geq 63$ : AsthmaMD received a mean SUS score of 63.1 (SD=20.1) | N/A                                               |
| and<br>Interpretation of qualitative data relating to usability                      | N/A                                                                                         | App judged as usable                                                 | N/A                                               |
| <b>4. Acceptability of ‘AsthmaMD’</b>                                                |                                                                                             |                                                                      |                                                   |
| Will the app receive a mean score $\geq 5$ for overall user satisfaction?            | $\geq 5$ overall satisfaction: AsthmaMD received a mean score of 5.8 (SD=2.2)               | N/A                                                                  | N/A                                               |
| or<br>Will $\geq 30\%$ of participants agree to 3/5 acceptability-related questions? | $\geq 30\%$ agree to 3/5 questions: $>30\%$ agreed/strongly agreed to 4/5 questions         | N/A                                                                  | N/A                                               |
| and<br>Interpretation of qualitative data relating to acceptability                  | App judged as highly acceptable                                                             | N/A                                                                  | N/A                                               |
| <b>5. Feasibility of ‘AsthmaMD’</b>                                                  |                                                                                             |                                                                      |                                                   |
| Did $\geq 30\%$ of participants use the app $\geq 1$ day per week?                   | $\geq 30\%$ used app $\geq 1$ day/week: 83.1% used the app $\geq 1$ day/week                | N/A                                                                  | N/A                                               |
| or<br>Would $\geq 30\%$ of participants continue to use the app after the study?     | N/A                                                                                         | $\geq 25\%$ continue to use app: 27.1% would continue to use the app | N/A                                               |
| and<br>Interpretation of qualitative data relating to feasibility                    | App judged as highly feasible                                                               | N/A                                                                  | N/A                                               |

<sup>a</sup>N/A: not applicable
